# Supplementary material for: Deficiency of CHAMP1, a gene related to intellectual disability, causes impaired neuronal development and a mild behavioural phenotype
Source: Brain Commun. 2022 Aug 30;4(5):fcac220. doi: 10.1093/braincomms/fcac220 (PMC9465530; doi:10.1093/braincomms/fcac220)
Supplement: fcac220_Supplementary_Data [file fcac220_supplementary_data.pdf]

## **Supplementary information**

### **Deficiency of *CHAMP1*, a gene related to intellectual disability, causes impaired neuronal development and a mild behavioral phenotype**

Masayoshi Nagai, Kenji Iemura, Takako Kikkawa, Sharmin Naher, Satoko Hattori, Hideo Hagihara, Koh-ichi Nagata, Hayato Anzawa, Risa Kugisaki, Hideki Wanibuchi, Takaya Abe, Kenichi Inoue, Kengo Kinoshita, Tsuyoshi Miyakawa, Noriko Osumi, and Kozo Tanaka

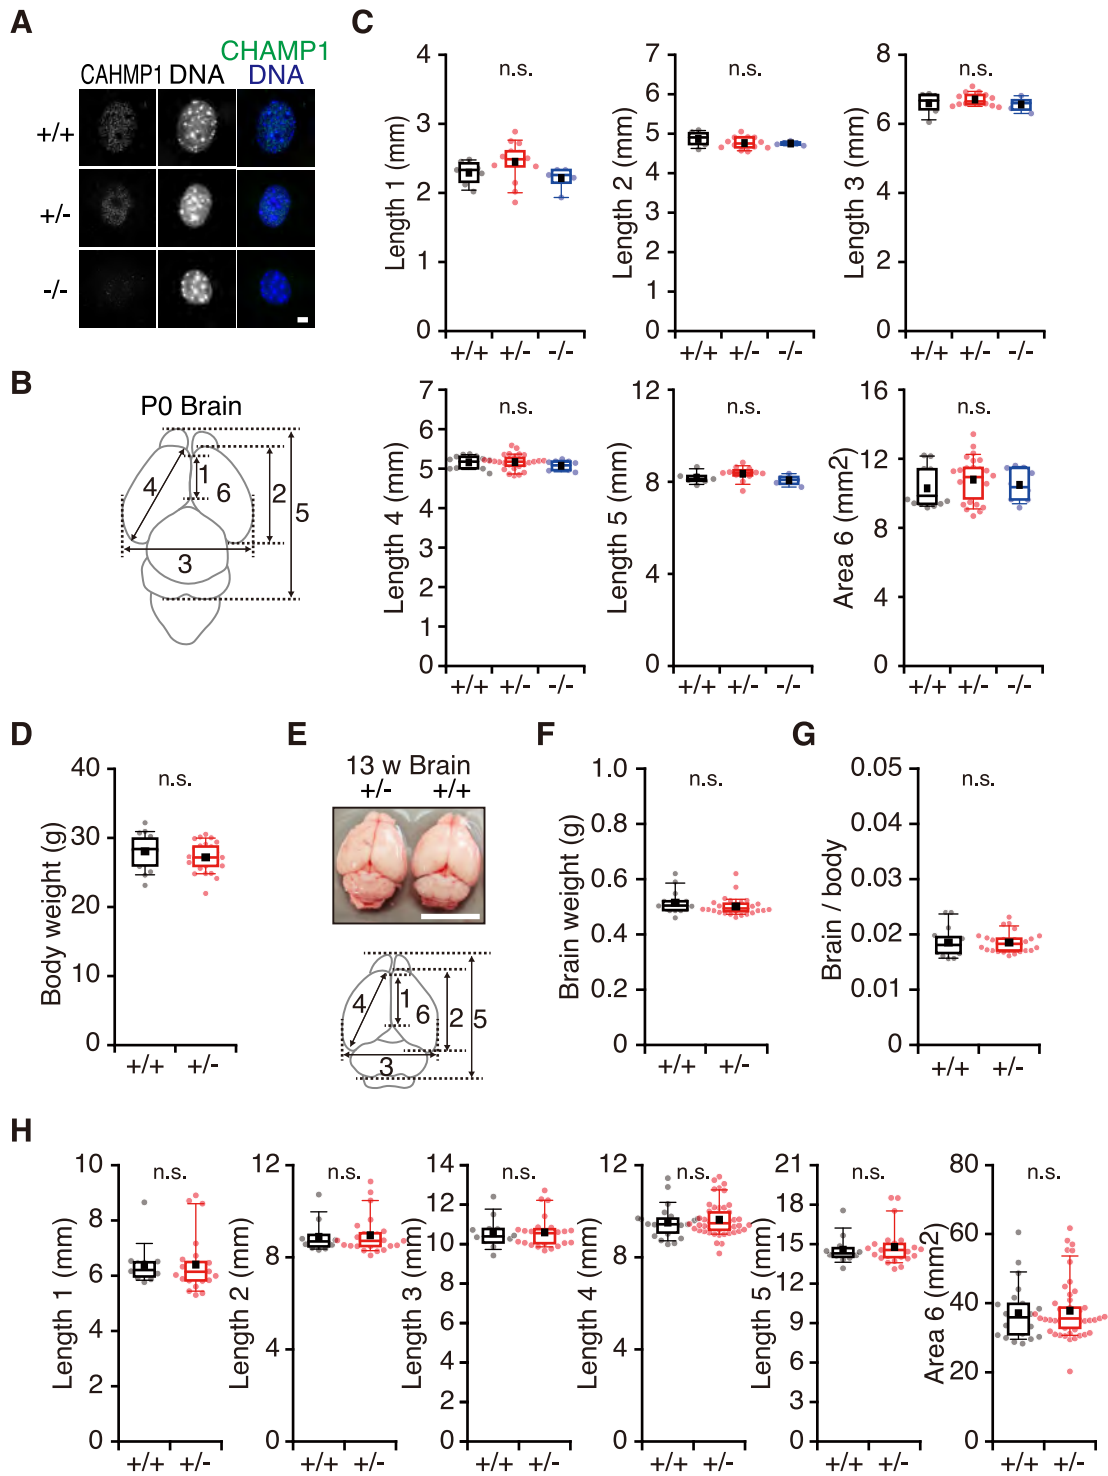

**Supplementary Figure 1. *CHAMPI*<sup>-/-</sup> mice do not show gross defects in brain size.**

(A) Immunofluorescence analysis of mouse embryonic fibroblasts (MEFs) isolated from *CHAMPI*<sup>+/+</sup>, *CHAMPI*<sup>+/-</sup>, and *CHAMPI*<sup>-/-</sup> mice using an antibody against CHAMPI (green). DNA was stained with DAPI (blue). Scale bar: 5  $\mu$ m. (B) Schematic diagrams of newborn mouse brains indicating cortical parameters measured in C. (C) Anteroposterior length (shown as 1 in (B)), cortex length (shown as 2 in (B)), cortex width (shown as 3 in (B)), cortex length 2 (shown as 4 in (B)), brain length (shown as 5 in (B)), and cortex area (shown as 6 in (B)) of *CHAMPI*<sup>+/+</sup> (black), *CHAMPI*<sup>+/-</sup> (red), and *CHAMPI*<sup>-/-</sup> (blue) mouse brains. (1-3, 5) *CHAMPI*<sup>+/+</sup>; n = 7, *CHAMPI*<sup>+/-</sup>; n = 14, *CHAMPI*<sup>-/-</sup>; n = 5. (4, 6) *CHAMPI*<sup>+/+</sup>; n = 14, *CHAMPI*<sup>+/-</sup>; n = 28, *CHAMPI*<sup>-/-</sup>; n = 10. (D) Absolute body weight of 13 week-old mice (*CHAMPI*<sup>+/+</sup> (black); n = 16, *CHAMPI*<sup>+/-</sup> (red); n = 29). (E) Representative pictures of 13 week-old *CHAMPI*<sup>+/+</sup> and *CHAMPI*<sup>+/-</sup> mouse brains and schematic diagrams of adult mouse brains indicating cortical parameters measured in H. Scale bar: 1 cm. (F, G) Absolute brain weight (F) and ratios of brain weight to body weight (G) of 13 week-old mice (*CHAMPI*<sup>+/+</sup> (black); n = 16, *CHAMPI*<sup>+/-</sup> (red); n = 29). (H) Anteroposterior length (shown as 1 in (E)), cortex length (shown as 2 in (E)), cortex width (shown as 3 in (E)), cortex length 2 (shown as 4 (E)), brain length (shown as 5 in (B)), and cortex area (shown as 6 in (B)) of 13 week-old *CHAMPI*<sup>+/+</sup> (black) and *CHAMPI*<sup>+/-</sup> (red) mouse brains. (1-3, 5) *CHAMPI*<sup>+/+</sup>; n = 12, *CHAMPI*<sup>+/-</sup>; n = 25. (4, 6) *CHAMPI*<sup>+/+</sup>; n = 24, *CHAMPI*<sup>+/-</sup>; n = 50. In box plots, the bottom and top of the box show the lower and upper quartile values, respectively. The mean is indicated with a filled square and the median is indicated with a bar in the box. The bottom and top of the whiskers denote the 10<sup>th</sup> and 90<sup>th</sup> percentiles, respectively. To judge whether the differences observed were statistically significant, *p* values for genotype effects were determined either by Kruskal–Wallis test. *n.s.*, not statistically significant.

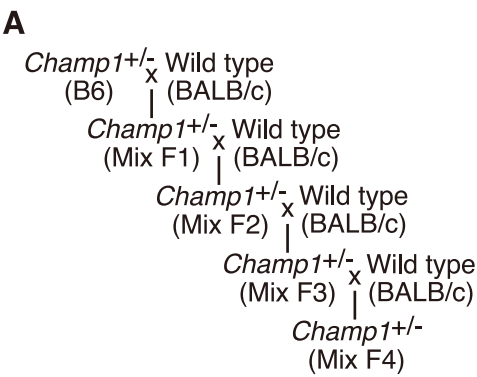

**B**

| +/- x +/-   | +/+          | +/-          | -/-          |
|-------------|--------------|--------------|--------------|
| Mix F1 x F1 | 42<br>(1.00) | 85<br>(2.02) | 16<br>(0.38) |
| Mix F2 x F2 | 33<br>(1.00) | 66<br>(2.00) | 6<br>(0.18)  |
| Mix F3 x F3 | 24<br>(1.00) | 40<br>(1.67) | 0            |
| Mix F4 x F4 | 23<br>(1.00) | 44<br>(1.91) | 0            |

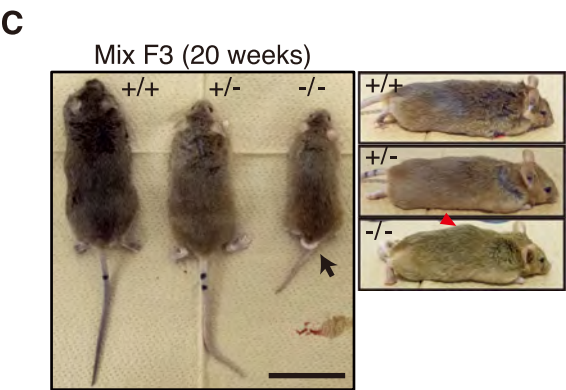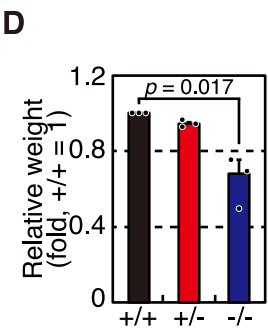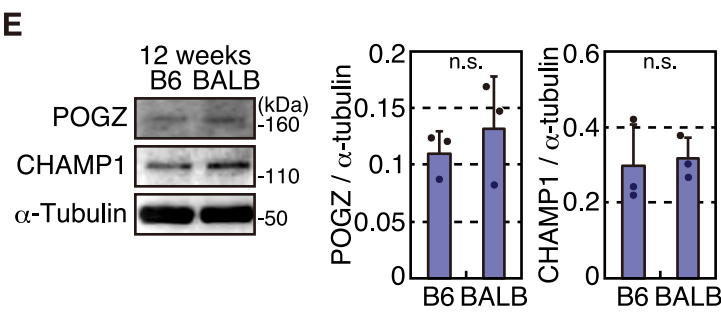

**Supplementary Figure 2. *CHAMP1*<sup>-/-</sup> mice can survive to adulthood on mixed genetic background.** (A) Procedure to produce *CHAMP1* knockout mice on mixed genetic background. (B) Number and ratio of *CHAMP1*<sup>+/+</sup>, *CHAMP1*<sup>+/-</sup>, *CHAMP1*<sup>-/-</sup> (blue) mice from crosses of *CHAMP1*<sup>+/-</sup> mice on respective mixed backgrounds as shown in (A). (C) (left) Representative picture of 20 week-old *CHAMP1*<sup>+/+</sup>, *CHAMP1*<sup>+/-</sup>, and *CHAMP1*<sup>-/-</sup> mice on mixed background (F3). Scale bar: 5 cm. (right) Side view of the mice shown in the left panel. Kinked tail and kyphosis in a *CHAMP1*<sup>-/-</sup> mouse are shown by black arrows and a red arrowhead, respectively. (D) Comparison of the body weight in newborn mice (*CHAMP1*<sup>+/+</sup> (black); n = 3, *CHAMP1*<sup>+/-</sup> (red); n = 3, *CHAMP1*<sup>-/-</sup> (blue); n = 3) on mixed background (F3). Error bars represent S.D. *p* values were determined by Student's *t*-test. (E) Expression of CHAMP1 and POGZ in C57BL/6 and Balb/c mice. Whole-cell lysates prepared from 12 week-old mouse brains were subjected to immunoblot analysis using antibodies as indicated. Quantification results of CHAMP1 and POGZ are shown on the right (n = 3). Error bars represent S.D. *p* values were determined by Student's *t*-test. n.s., not statistically significant.

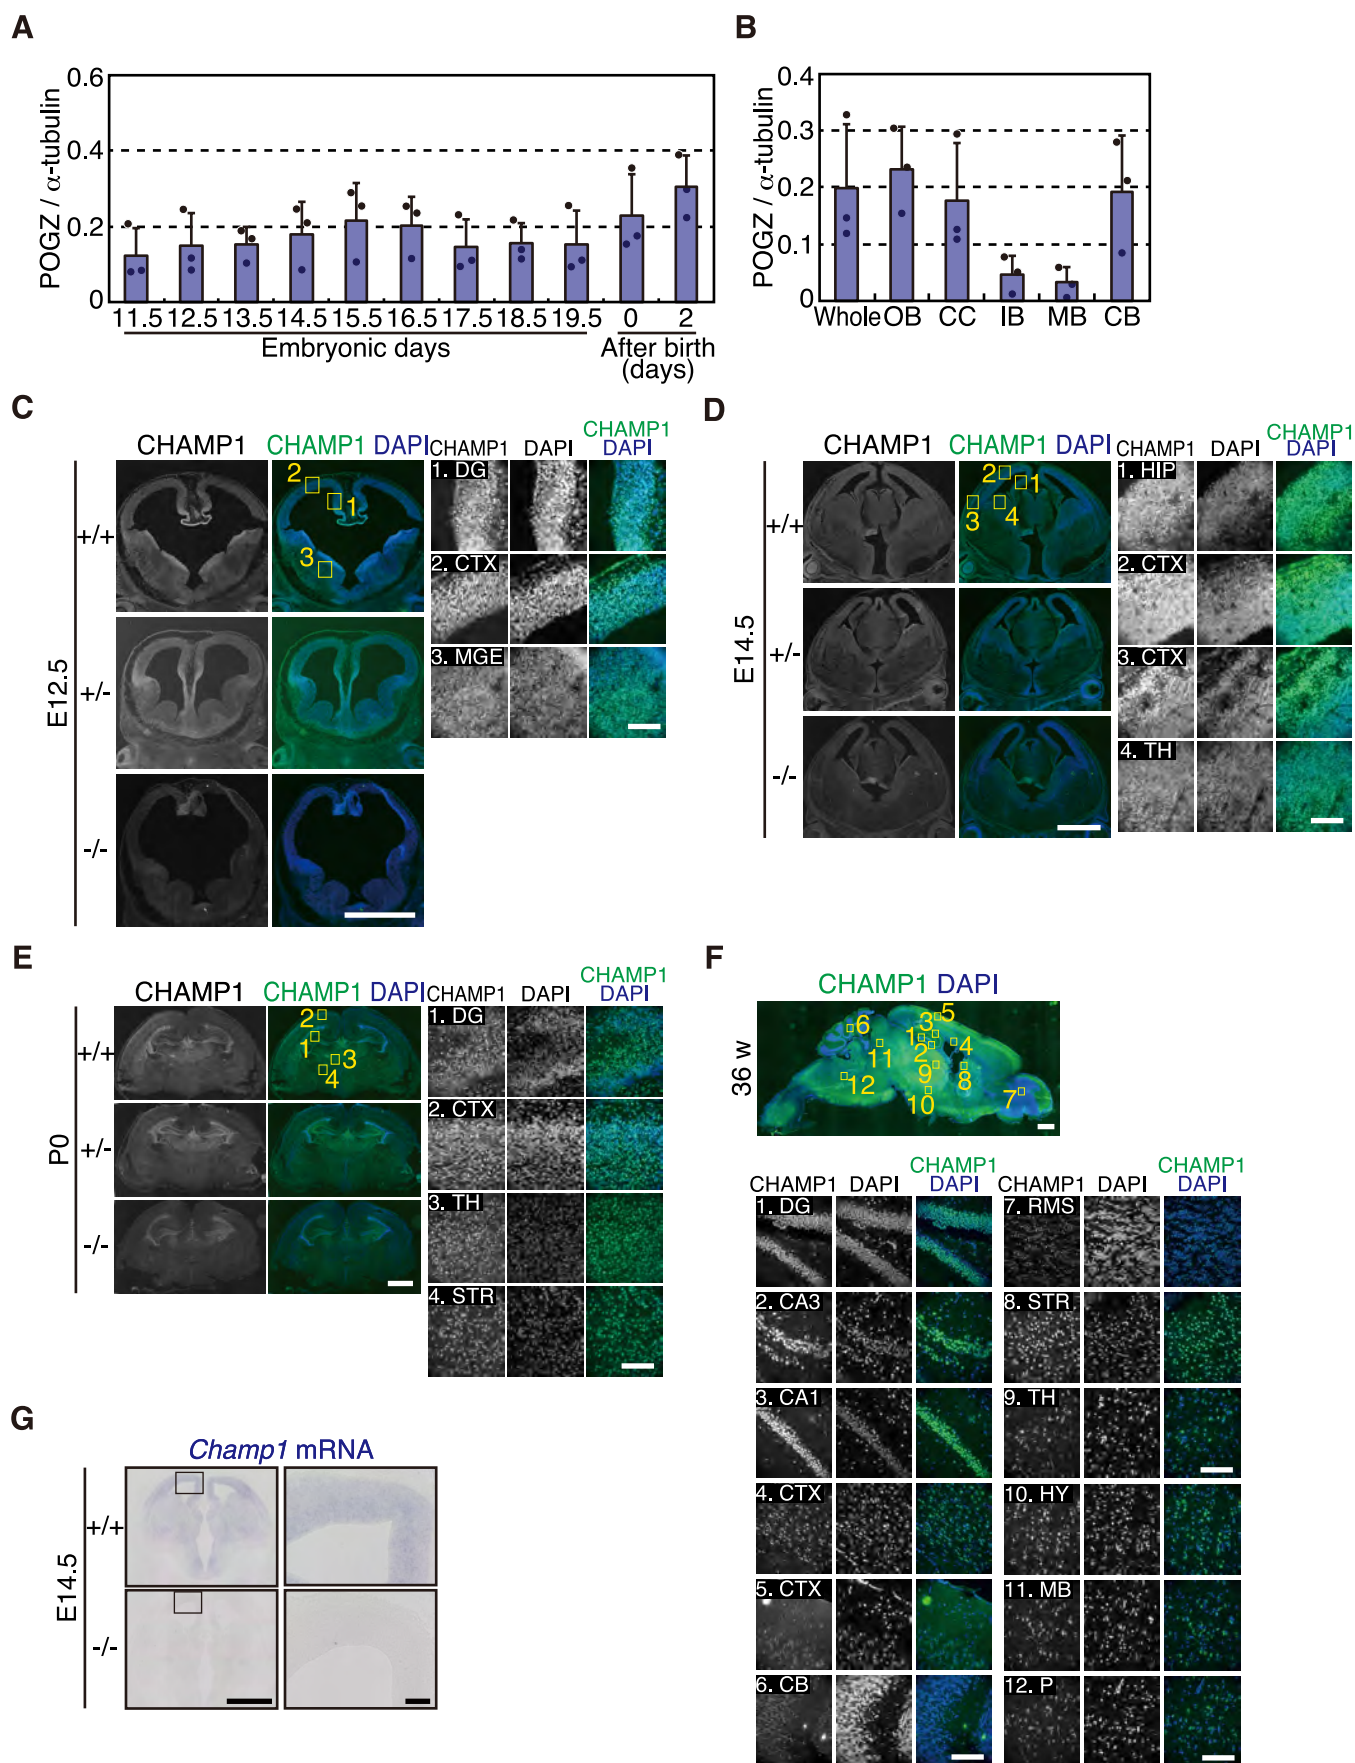

**Supplementary Figure 3. POGZ and CHAMP1 expression in mouse brains.** (A) Quantification results of POGZ in brain during development shown in Fig. 2A (n = 3). (B) Quantification results of POGZ in whole brain, olfactory bulb (OB), cerebral cortex (CC), interbrain (IB), midbrain (MB), and cerebellum (CB) of newborn mice shown in Fig. 2B. (C–E) Immunofluorescence staining of coronal cortical sections from E12.5 (C), E14.5 (D), and newborn (E) *CHAMP1*<sup>+/+</sup> (upper), *CHAMP1*<sup>+/-</sup> (middle), and *CHAMP1*<sup>-/-</sup> (lower) mouse brains using an antibody against CHAMP1 (green). Nuclei were stained with DAPI (blue). (F) Immunofluorescence staining of a sagittal section from a 36 week-old mouse using an antibody against CHAMP1 (green). Nuclei were stained with DAPI (blue). Scale bars: 1 mm. Scale bars in close-up images of boxed area: 100  $\mu$ m. DG, dentate gyrus; CTX, cerebral cortex; Tel: telencephalon, HIP, hippocampus; TH, thalamus; CA, caudate nucleus; CB, cerebellum; RMS, rostral migratory stream; STR, striatum; HY, hypothalamus; MB, midbrain; P, pons. (G) *In situ* hybridization of *CHAMP1* in coronal cortical sections from E14.5 *CHAMP1*<sup>+/+</sup> (upper) and *CHAMP1*<sup>-/-</sup> (lower) mouse brains. Scale bar: 1 mm. Scale bar in close-up images of boxed area: 100  $\mu$ m.

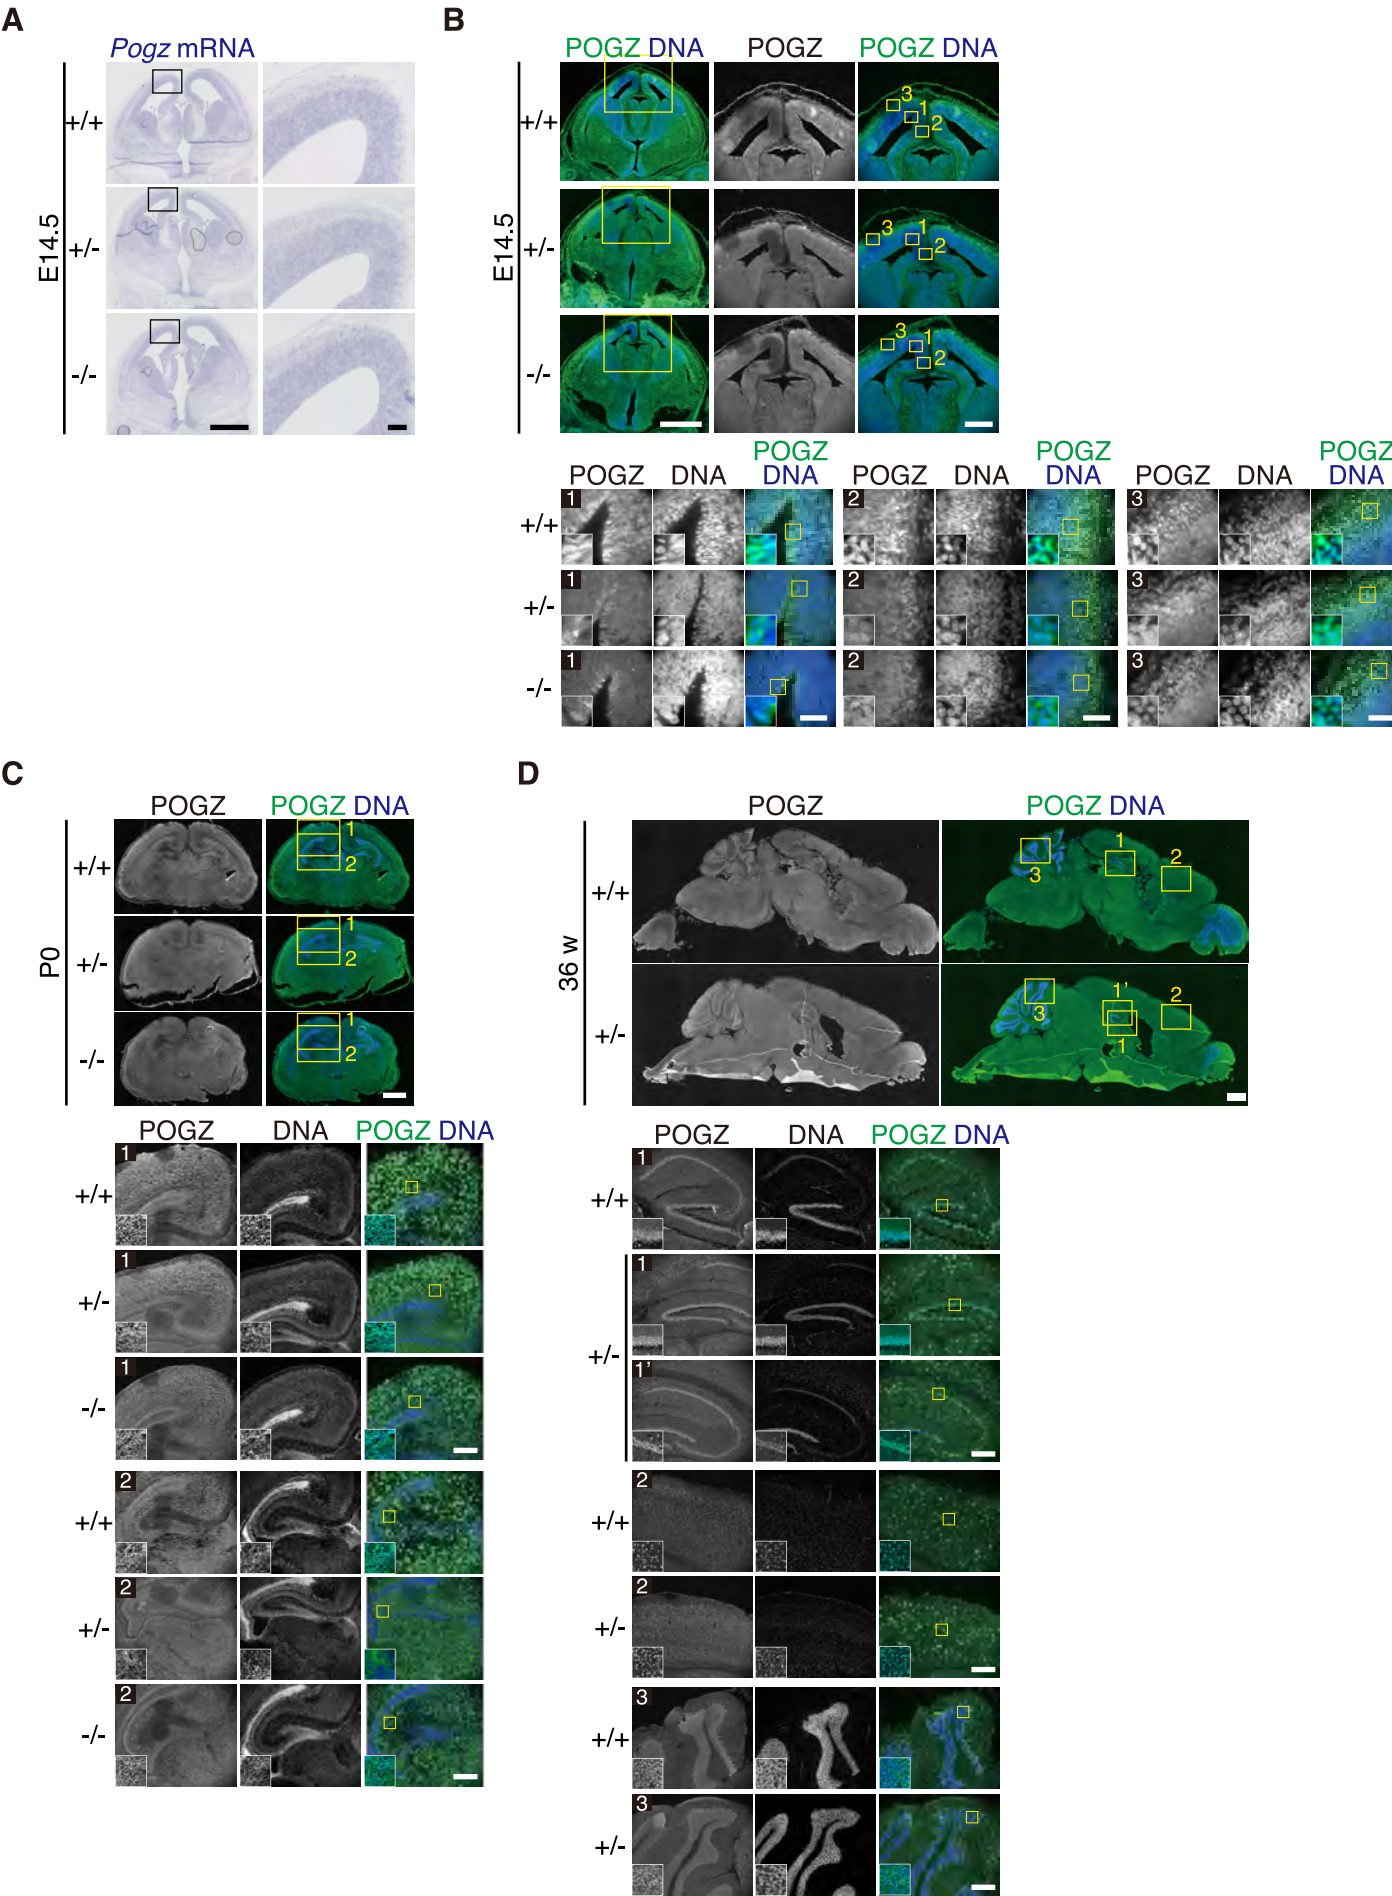

**Supplementary Figure 4. POGZ expression in *CHAMPI* knockout mouse brains.** (A) *In situ* hybridization of *POGZ* in coronal cortical sections from E14.5 *CHAMPI*<sup>+/+</sup> (upper), *CHAMPI*<sup>+/-</sup> (middle), and *CHAMPI*<sup>-/-</sup> (lower) mouse brains. Scale bar: 1 mm. Scale bar in close-up images of boxed area: 100  $\mu$ m. (B–D) Immunofluorescence staining of coronal cortical sections from E14.5 (B), newborn (C) *CHAMPI*<sup>+/+</sup> (upper), *CHAMPI*<sup>+/-</sup> (middle), and *CHAMPI*<sup>-/-</sup> (lower) mouse brains, and sagittal sections from (D) *CHAMPI*<sup>+/+</sup> (upper; 36 week-old) and *CHAMPI*<sup>+/-</sup> (lower; 37 week-old) mouse brains using an antibody against POGZ (green). Nuclei were stained with DAPI (blue). Scale bars: 1 mm. Scale bars in close-up images of boxed area: 50  $\mu$ m (B) or 100  $\mu$ m (C, D).

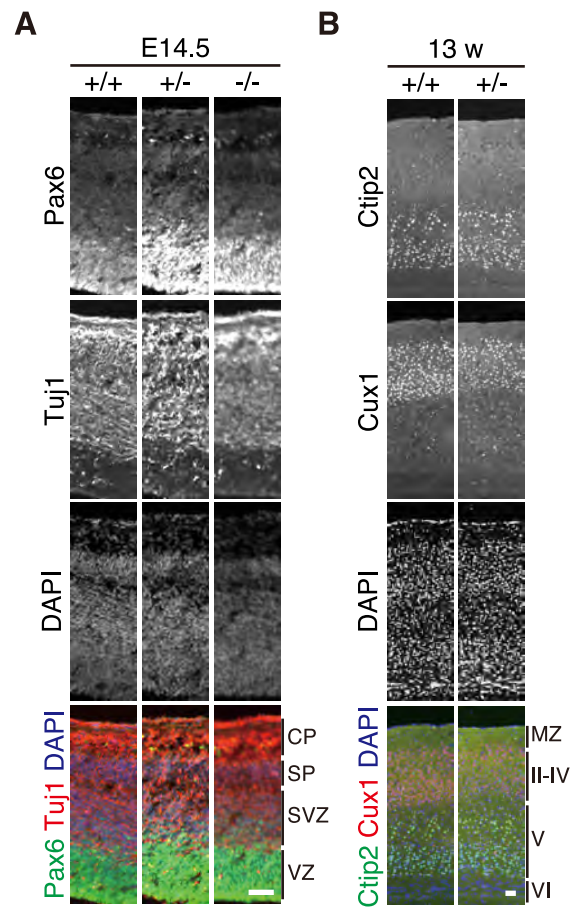

**Supplementary Figure 5. *CHAMPI*<sup>-/-</sup> mice do not show gross defects in brain structure.** (A) Immunofluorescence staining of a large dorsal cortical region of E14.5 *CHAMPI*<sup>+/+</sup>, *CHAMPI*<sup>+/-</sup>, and *CHAMPI*<sup>-/-</sup> mice using antibodies against Pax6 (green) and Tuj1 (red). Nuclei were stained with DAPI (blue). Scale bar: 50  $\mu$ m. (B) Immunofluorescence staining of a large dorsal cortical region of 35 week-old *CHAMPI*<sup>+/+</sup> and *CHAMPI*<sup>+/-</sup> mice using antibodies against Ctip2 (green) and Cux1 (red). Nuclei were stained with DAPI (blue). Scale bars: 50  $\mu$ m. CP, cortical plate; SP, sub-plate; SVZ, sub-ventricular zone; VZ, ventricular zone; II~VI, cortical layers.

**A**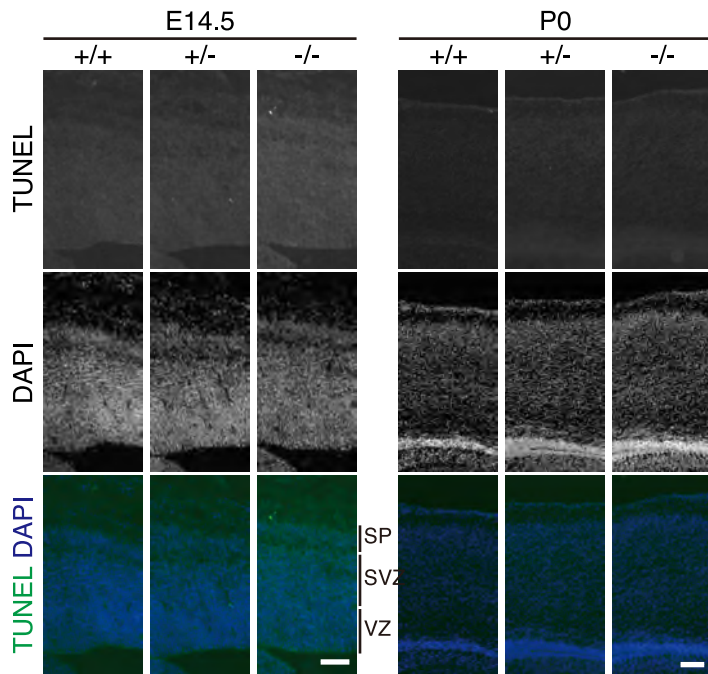**B**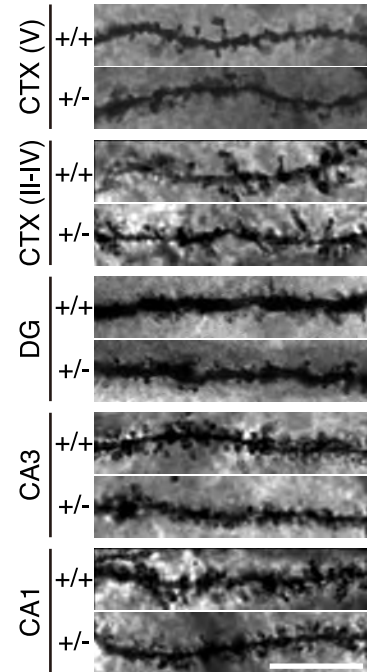**C**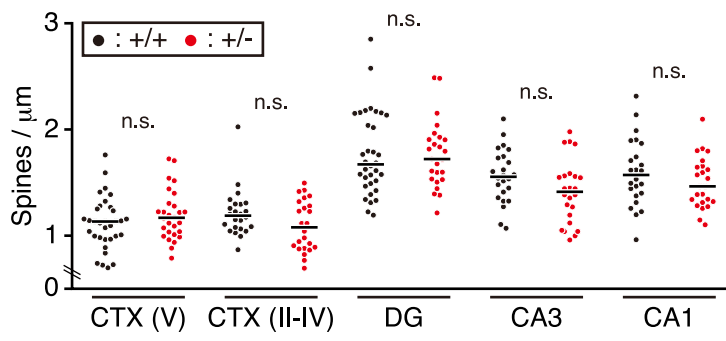**D**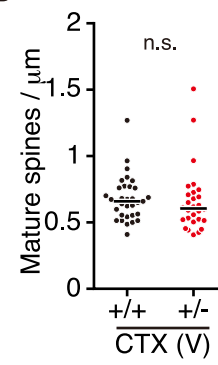

**Supplementary Figure 6. TUNEL staining and Golgi–Cox staining of *CHAMPI* knockout mouse brain.** (A) TUNEL staining (green) of a large dorsal cortical region of E14.5 or newborn *CHAMPI*<sup>+/+</sup>, *CHAMPI*<sup>+/-</sup>, and *CHAMPI*<sup>-/-</sup> mice. Nuclei were stained with DAPI (blue). Scale bars: 100  $\mu$ m. SP, sub-plate; SVZ, sub-ventricular zone; VZ, ventricular zone; MZ, marginal zone; CP, cortical plate; IZ, intermediate zone. (B) Dendrites in cerebral cortex (CTX), dentate gyrus (DG), and caudate nucleus (CA) of 13 week-old *CHAMPI*<sup>+/+</sup> and *CHAMPI*<sup>+/-</sup> mice visualized by Golgi–Cox staining. Scale bar: 10  $\mu$ m. (C) Dendritic spine density in 13 week-old mouse brains (*CHAMPI*<sup>+/+</sup>: CTX (V); n = 33, CTX (II-IV); n = 24, DG; n = 34, CA3; n = 24, CA1; n = 24, *CHAMPI*<sup>+/-</sup>: CTX (V); n = 28, CTX (II-IV); n = 24, DG; n = 25, CA3; n = 24, CA1; n = 24). The median is indicated with a bar. *p* values were determined by the Mann–Whitney *U*-test. n.s., not statistically significant. (D) Mature spine density in layer 5 of cerebral cortex of 13 week-old mice (*CHAMPI*<sup>+/+</sup>: CTX (V); n = 33, *CHAMPI*<sup>+/-</sup>: CTX (V); n = 28). The median is indicated with a bar. *p* value was determined by the Mann–Whitney *U*-test. n.s., not statistically significant.

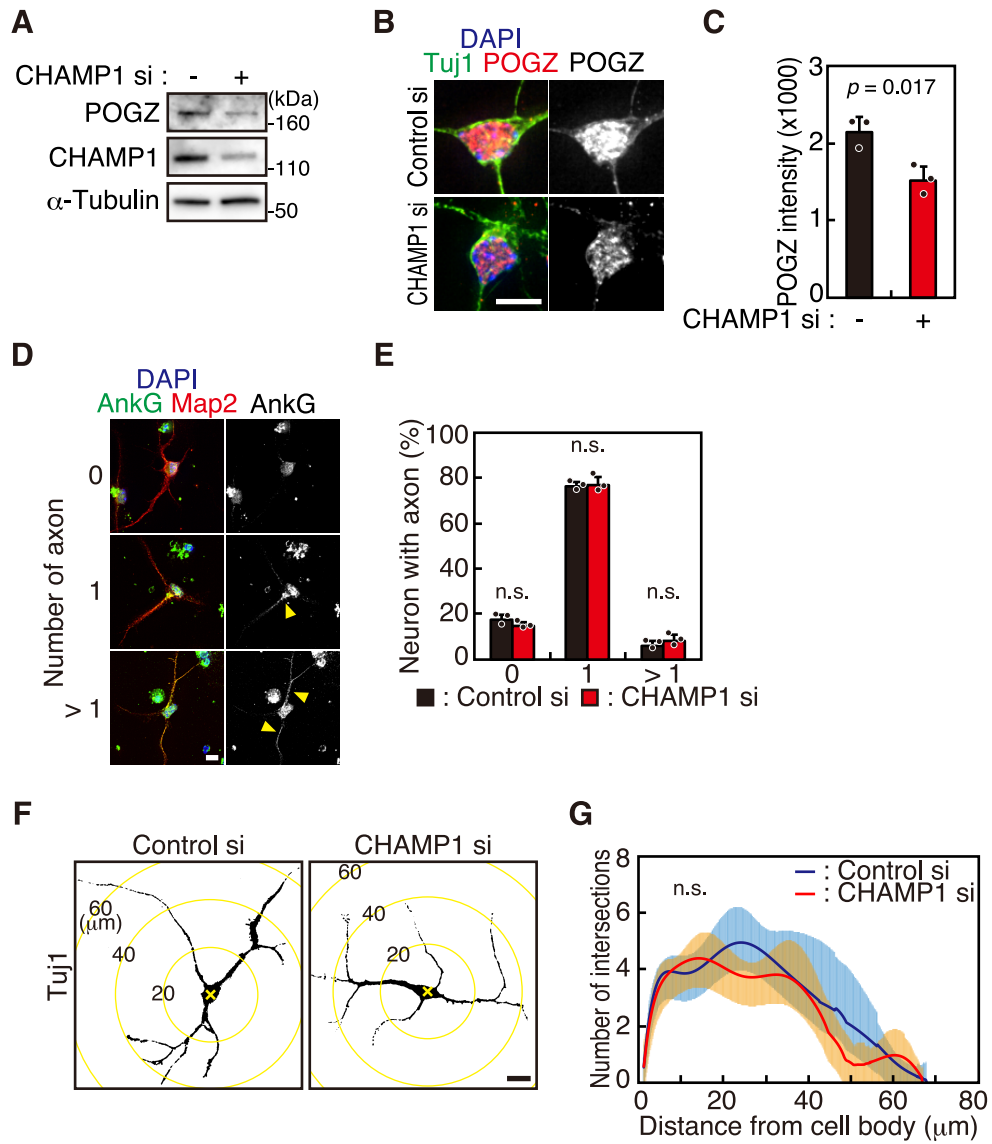

**Supplementary Figure 7. Axon outgrowth and dendritic branching in CHAMP1 knockdown neurons.** (A) *CHAMP1* RNAi in neurons. Neurospheres transfected with a *CHAMP1* siRNA were differentiated for five days and subjected to immunoblot analysis using antibodies as indicated. (B) POGZ localization in control or CHAMP1 knockdown neurons. Neurospheres transfected with a *CHAMP1* siRNA were differentiated for five days and immunostained with antibodies against Tuj1 (green) and POGZ (red). Nuclei were stained with DAPI (blue). Scale bar: 10  $\mu$ m. (C) Signal intensity of POGZ immunofluorescence in control or CHAMP1 knockdown neurons (n = 3 mice, data represent average intensity from 10 cells per mouse). Error bars represent S.D. *p* values were determined by Student's t-test. (D) Immunofluorescence staining of neurons differentiated from neurospheres with different number of axons using antibodies against Map2 (red) and Ankyrin-G (green). Nuclei were stained with DAPI (blue). Scale bar: 10  $\mu$ m. (E) Number of axons in CHAMP1 knockdown neurons treated as in (D). The data represent a minimum of 81 cells for each condition. Error bars represents S.D. *p* values were determined by Tukey–Kramer test. n.s., not statistically significant. (F) Representative images of dendritic branching in control or CHAMP1 knockdown neurons differentiated from neurospheres. Distance (in  $\mu$ m) from the center of the cell body, shown as “X”, is indicated for Sholl analysis. (G) Quantification of the number of intersections of control or CHAMP1 knockdown neurons differentiated from neurospheres at various distances from the cell body by Sholl analysis (n = 6 differentiated neurons). S.D. is indicated as shaded area. *p* values were determined by Tukey–Kramer test. n.s., not statistically significant.

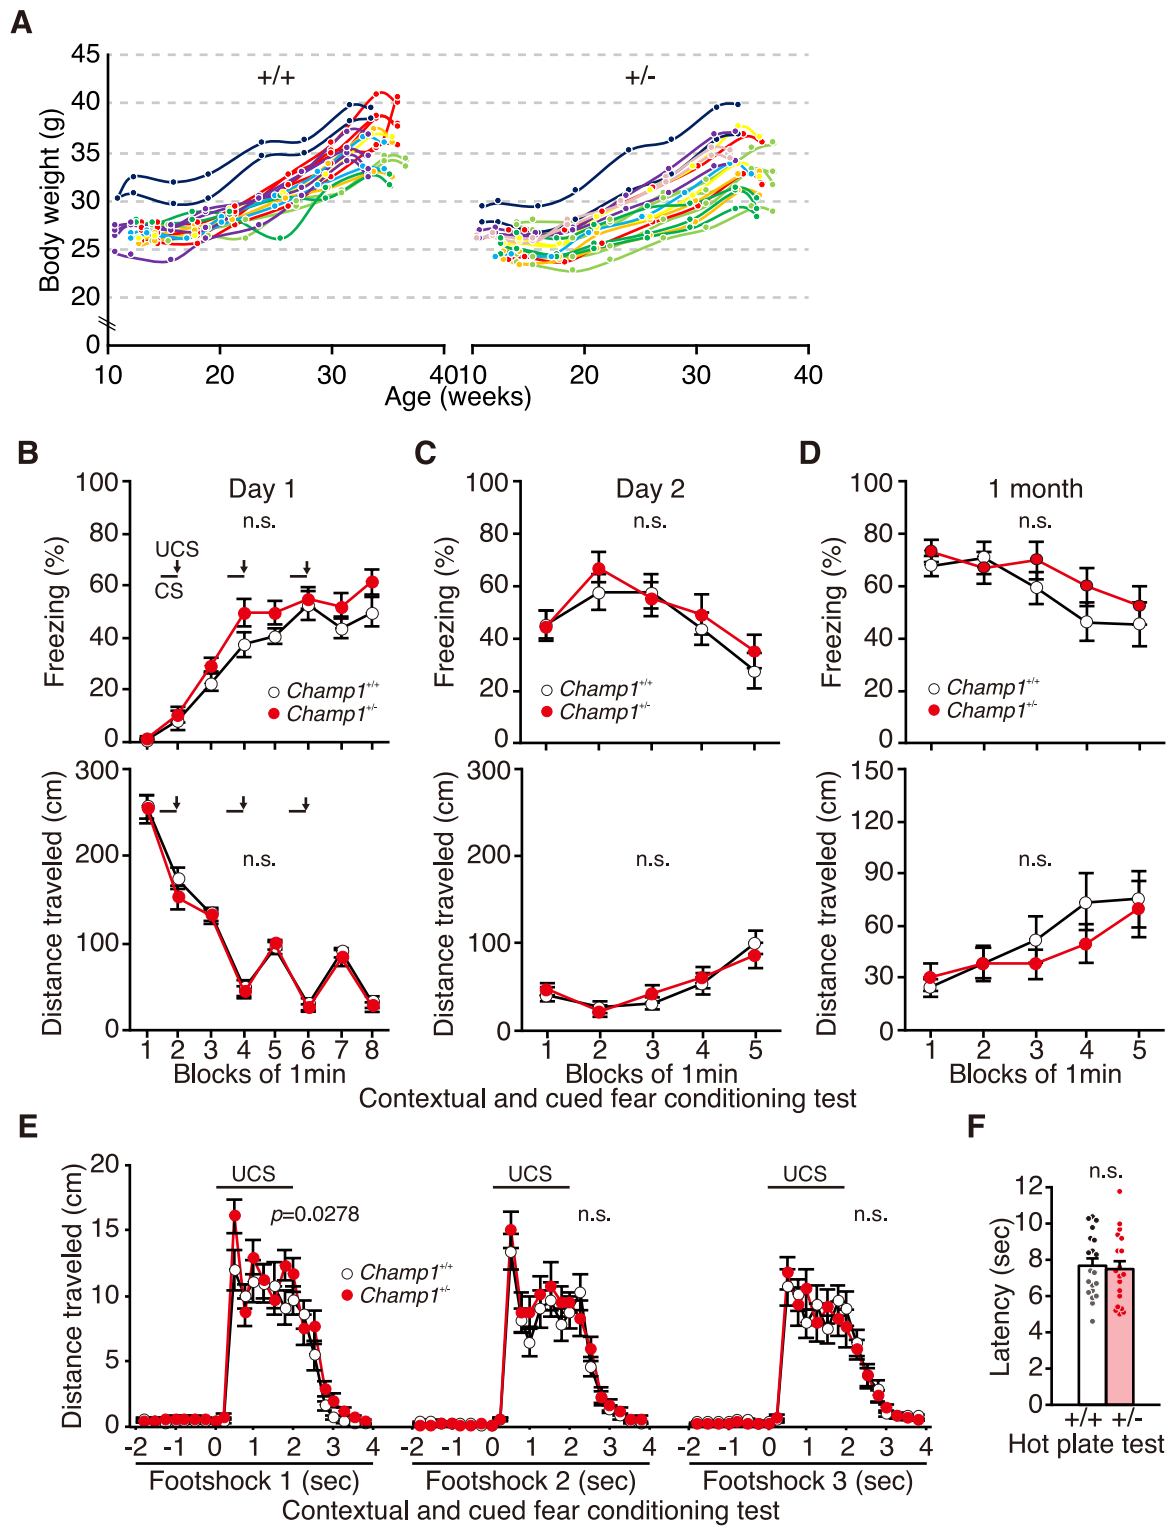

**Supplementary Figure 8. Body weight, contextual and cued fear conditioning test, and hot plate test in *CHAMPI*<sup>+/-</sup> mice.** (A) Body weight of *CHAMPI*<sup>+/+</sup> (+/+; n = 20) and *CHAMPI*<sup>+/-</sup> (+/-; n = 20) mice during the observation period of the behavioral test battery, plotted against age in weeks. Littermates are shown in the same colors. (B–E) Contextual and cued fear conditioning test: (B) percentage of freezing and total distance traveled in conditioning on day 1, (C) percentage of freezing and total distance traveled in context testing on day 2, (D) percentage of freezing and total distance traveled in context testing after 1 month, and (E) distance traveled during and after each foot shock in conditioning on day 1 of *CHAMPI*<sup>+/+</sup> (white circle) and *CHAMPI*<sup>+/-</sup> (red circle) mice. CS (conditioned stimulus): 55 dB white noise (30 sec). UCS (unconditioned stimulus): 0.3 mA foot shock (2 sec). (F) Latency to the first hind paw response of *CHAMPI*<sup>+/+</sup> (white bar) and *CHAMPI*<sup>+/-</sup> (red bar) mice in the hot-plate test. For (B–F), twenty male mice of both genotypes were used. Error bars represent S.E.M. To judge whether the differences observed were statistically significant, *p* values for genotype effects were determined either by two-way repeated measurement ANOVA (B–E) or Student's *t*-test (F).

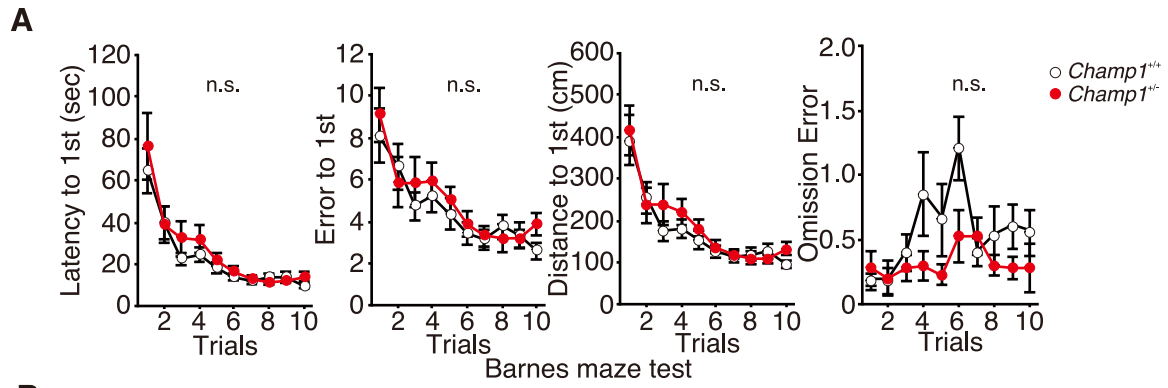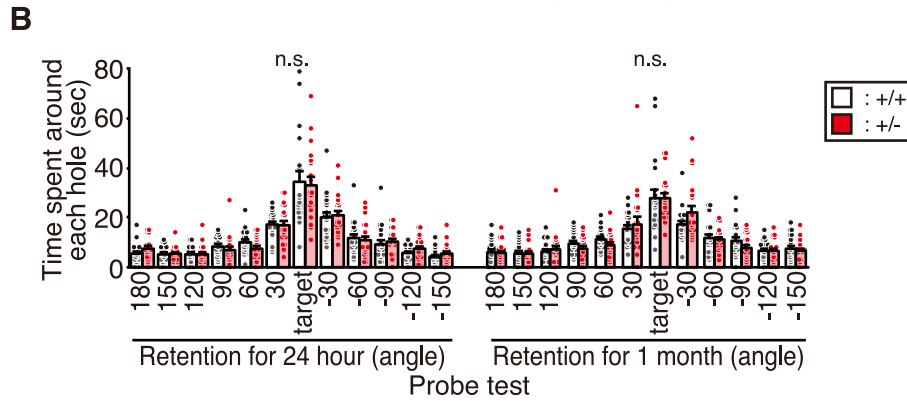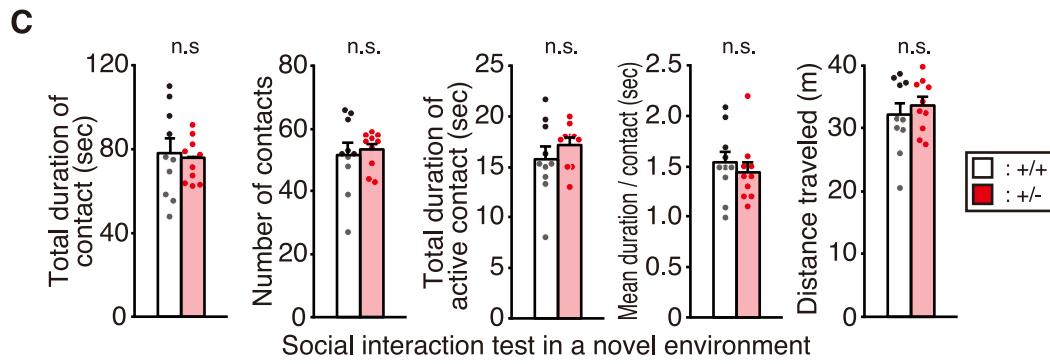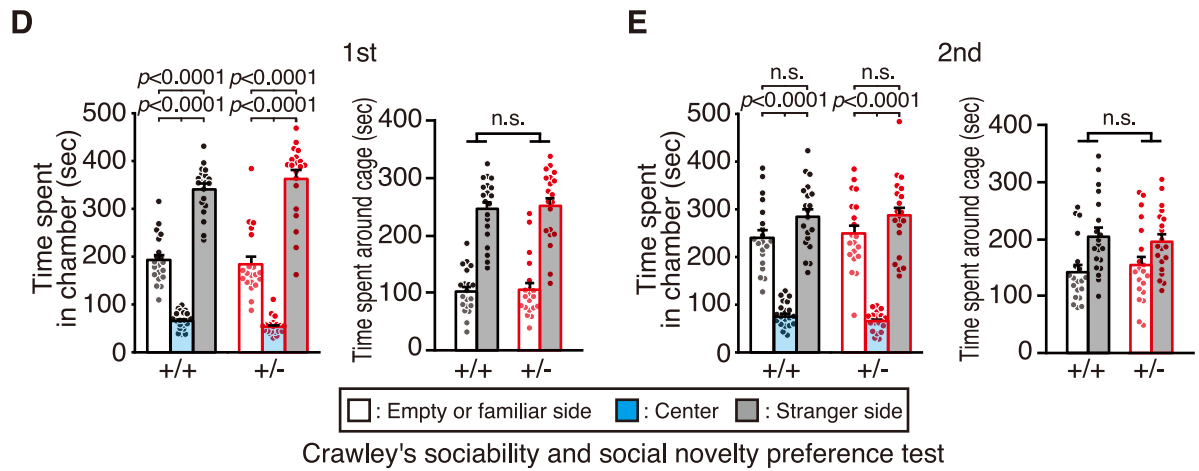

**Supplementary Figure 9. Barnes maze test, social interaction test, and Crawley's sociability and social novelty preference test in *CHAMPI*<sup>+/-</sup> mice.** (A, B) Barnes maze test: (A) latency to reach the target, number of errors until reaching the target, total distance traveled to reach the target, and number of errors to enter the escape box after reaching the target for *CHAMPI*<sup>+/+</sup> (white circle) and *CHAMPI*<sup>+/-</sup> (red circle) mice and (B) time spent around each hole in the first and the second probe test by *CHAMPI*<sup>+/+</sup> (white bars) and *CHAMPI*<sup>+/-</sup> (red bars) mice. (C) Social interaction test: total duration of contact, number of contacts, total duration of active contact, mean duration of each contact, and total distance traveled of *CHAMPI*<sup>+/+</sup> (white bar) and *CHAMPI*<sup>+/-</sup> (red bar) mice. (D, E) Crawley's sociability and social novelty preference test: (D) left graph: time spent in the chamber with an empty cage (white bars), the center chamber (light blue bars), or the chamber with a cage containing a stranger mouse (stranger 1, gray bars) during the first task, right graph: time spent around empty (white bars) or stranger (black bars) cage during the first task, by *CHAMPI*<sup>+/+</sup> (black dots) and *CHAMPI*<sup>+/-</sup> (red dots) mice. (E) left graph: time spent in the chamber with the cage containing stranger 1 (white bars), the center chamber (light blue bars), or the chamber with a cage containing a novel unfamiliar mouse (stranger 2, gray bars) during the second task, right graph: time spent around familiar (white bars) or stranger (black bars) cage during the second task, by *CHAMPI*<sup>+/+</sup> (black dots) and *CHAMPI*<sup>+/-</sup> (red dots) mice. Error bars represent S.E.M. *p* values for genotype effects were determined either by two-way repeated measurement ANOVA (A, B), Student's *t*-test (C), and paired *t*-test (D, E).

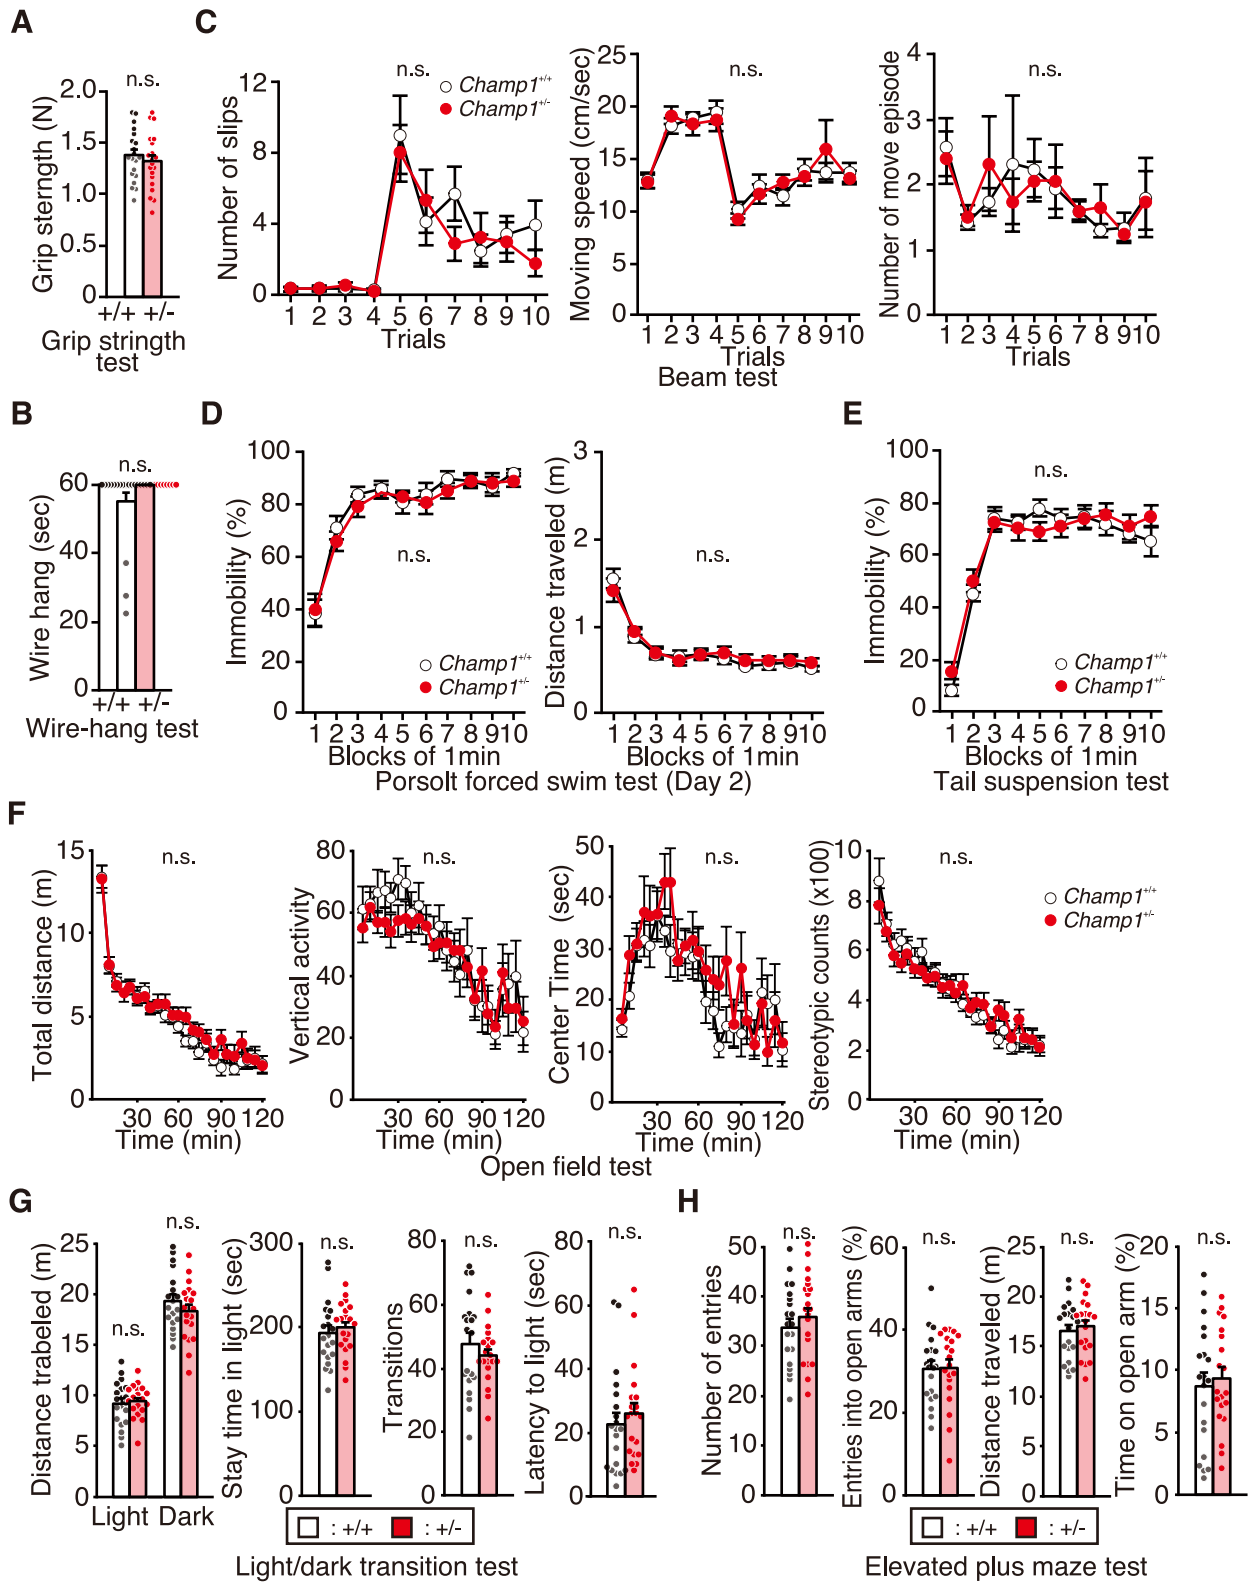

**Supplementary Figure 10. Grip strength test, wire-hang test, beam test, Porsolt forced swim test, tail suspension test, open field test, light/dark transition test, and elevated plus maze test in *CHAMPI*<sup>+/-</sup> mice.** (A) Grip strength of *CHAMPI*<sup>+/+</sup> (white bar) and *CHAMPI*<sup>+/-</sup> (red bar) mice. (B) Latency to fall of *CHAMPI*<sup>+/+</sup> (white bar) and *CHAMPI*<sup>+/-</sup> (red bar) mice in the wire-hang test. (C) Beam test: number of slips, moving speed, and number of move episode for *CHAMPI*<sup>+/+</sup> (white circle) and *CHAMPI*<sup>+/-</sup> (red circle) mice. (D) Porsolt forced swim test: percentage of immobility and total distance traveled of *CHAMPI*<sup>+/+</sup> (white circle) and *CHAMPI*<sup>+/-</sup> (red circle) mice on day 2. (E) Percentage of immobility of *CHAMPI*<sup>+/+</sup> (white circle) and *CHAMPI*<sup>+/-</sup> (red circle) mice in the tail suspension test. (F) Open field test: distance traveled, vertical activity, center time, and stereotypic counts for each 5-minute block of testing of *CHAMPI*<sup>+/+</sup> (white circle) and *CHAMPI*<sup>+/-</sup> (red circle) mice. (G) Light/dark transition test: distance traveled in the light and dark chambers, time spent in the light chamber, number of transitions, and latency to enter the light chamber of *CHAMPI*<sup>+/+</sup> (white bars) and *CHAMPI*<sup>+/-</sup> (red bars) mice. (H) Elevated plus maze test: number of arm entries, entries into open arms, distance traveled, and time spent in open arms of *CHAMPI*<sup>+/+</sup> (white bars) and *CHAMPI*<sup>+/-</sup> (red bars) mice. Twenty male mice of both genotypes were used. Error bars represent S.E.M. *p* values were determined either by Student's *t*-test (A, B, G, H) or two-way repeated measurement ANOVA (C–F).

**A**

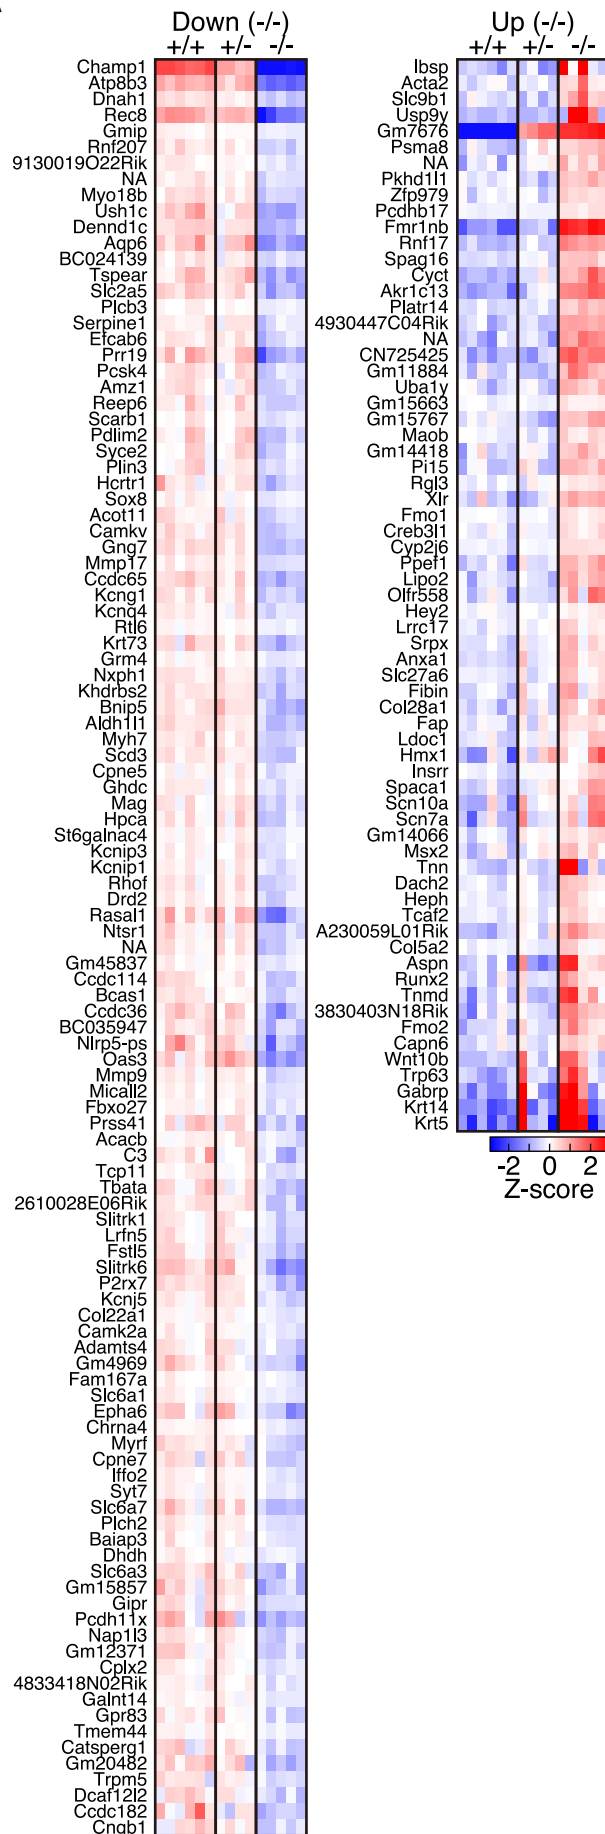

**B**

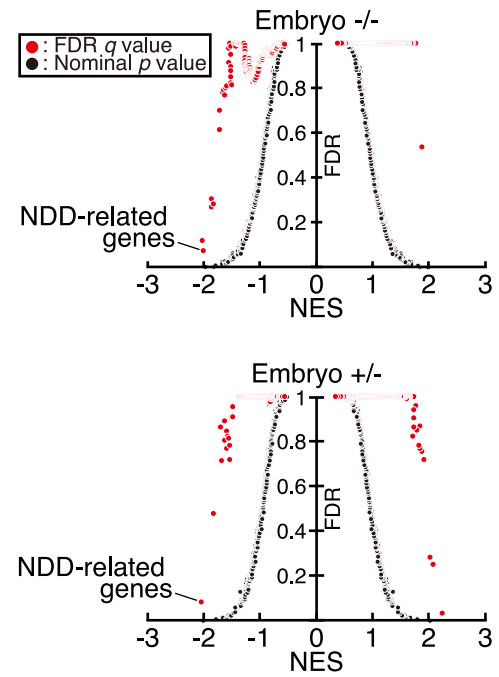

**Supplementary Figure 11. Gene expression changes in *CHAMPI* knockout mice.** (A) Heatmap visualization of DEGs between wild type, *CHAMPI*<sup>+/-</sup> and *CHAMPI*<sup>-/-</sup> embryonic brains with FDR <0.1 and fold change >1.2. (B) Normalized enrichment score (NES) versus FDR *q* value (red dots) and nominal *p* value (black dots) in GSEA between wild type and *CHAMPI*<sup>-/-</sup> (upper) or *CHAMPI*<sup>+/-</sup> (lower) embryonic brains for the NDD-related gene set and 1,000 randomly picked gene sets.

Figure 1E

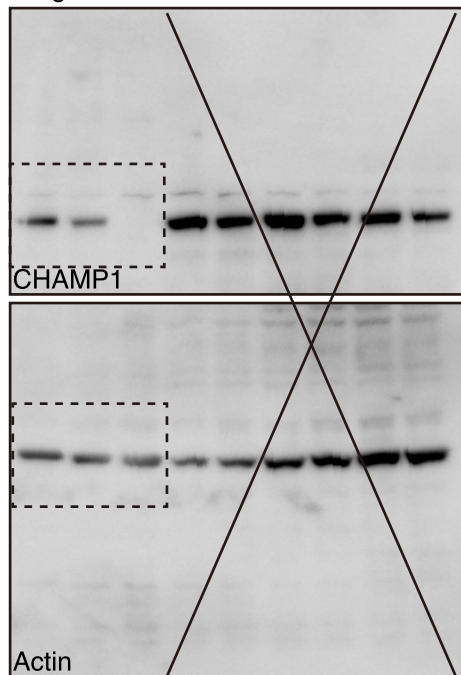

(Long exposure)

Figure 5A (left)

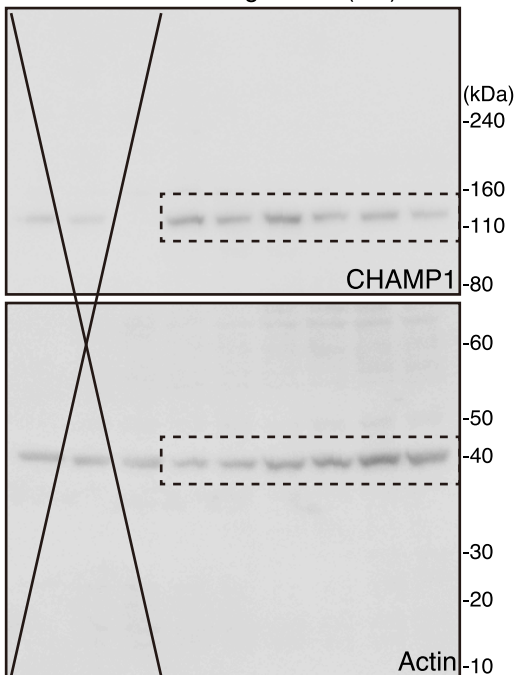

(Short exposure)

Figure 2A

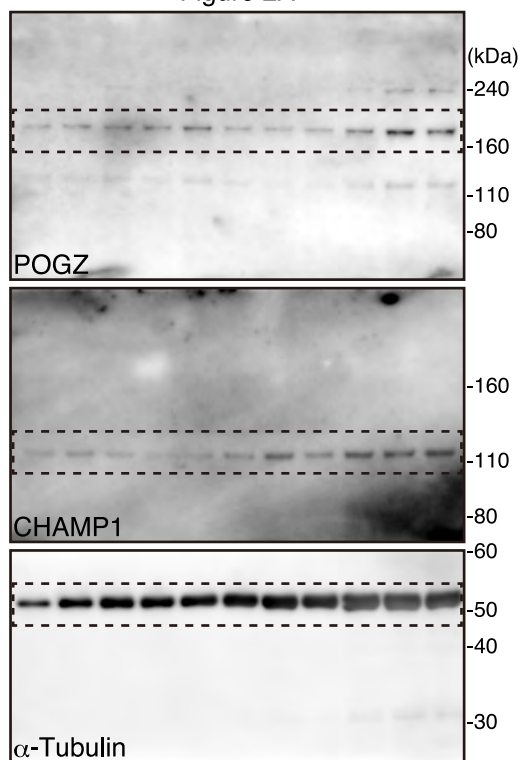

Figure 2B

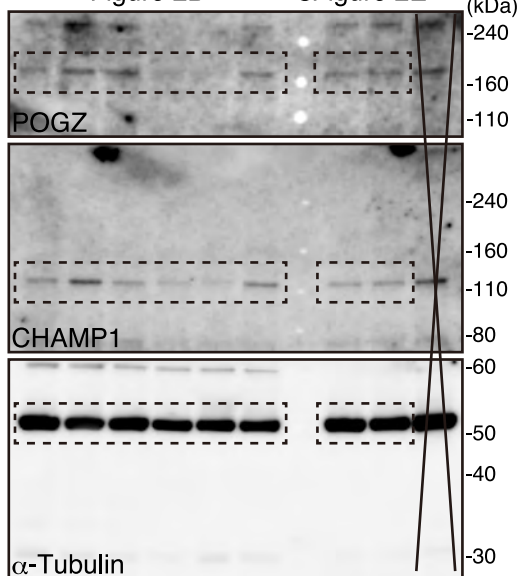

sFigure 2E



sFigure 7A

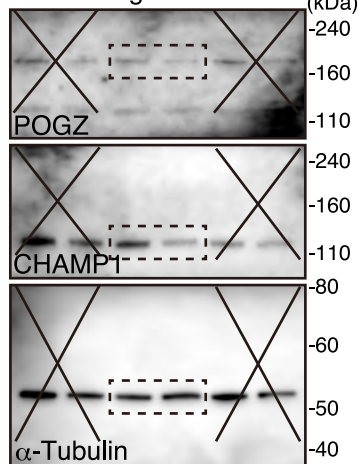

**Supplementary Figure 12. Uncropped images of the Western blots shown in the figures.**
